# Supplementary material for: Remarkable Stability Improvement of ZnO TFT with Al2O3 Gate Insulator by Yttrium Passivation with Spray Pyrolysis
Source: MDPI journal article supplement (doi:10.3390/nano10050976), 2020-05-19
Supplement: s1 [file s1]

# Supporting information

*Article*

## **Remarkable Stability Improvement of ZnO TFT with Al<sub>2</sub>O<sub>3</sub> Gate Insulator by Yttrium Passivation with Spray Pyrolysis**

**Jewel Kumer Saha,<sup>1,2</sup> Ravindra Naik Bukke,<sup>1</sup> Narendra Naik Mude,<sup>1</sup> and Jin Jang<sup>1\*</sup>**

<sup>1</sup> Advanced Display Research Center (ADRC), Department of Information Display, Kyung Hee University, 26, Kyungheedae-ro, Dongdaemun-gu, Seoul 02447, Korea,

<sup>2</sup> Department of Physics, Jagannath University, Dhaka-1100, Bangladesh

\* E-mail: [jjang@khu.ac.kr](mailto:jjang@khu.ac.kr)

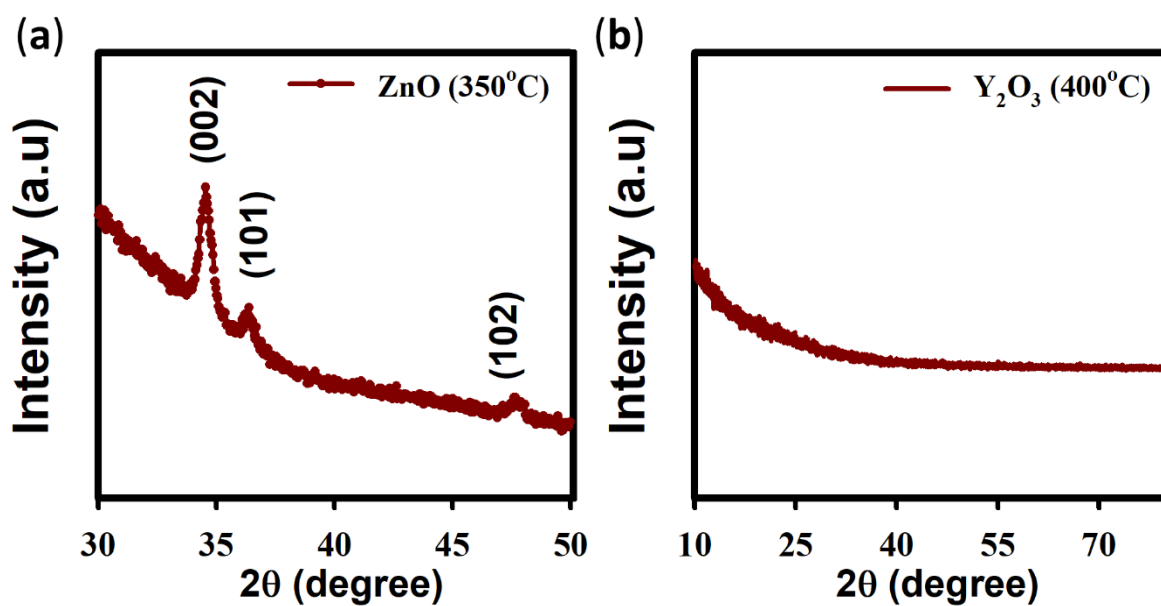

**Figure S1.** XRD spectra of (a) ZnO film deposited at 350°C (b) Y<sub>2</sub>O<sub>3</sub> film deposited at 400°C. The three peaks corresponded to the (002), (101), and (102) planes of hexagonal wurtzite structure where the most preferred orientation is (002) plane. The Y<sub>2</sub>O<sub>3</sub> film shows no prominent XRD peak confirms the amorphous nature.

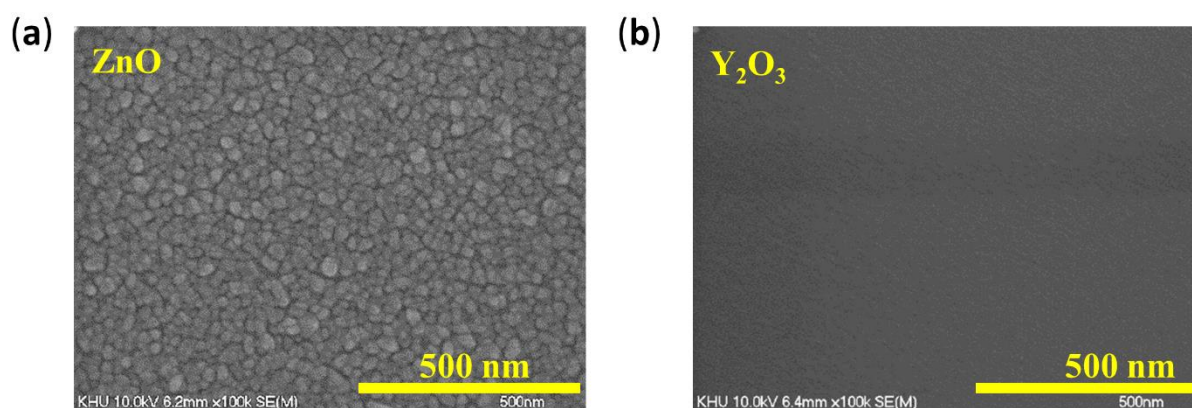

**Figure S2.** SEM image of (a) nano-crystalline ZnO film (b) amorphous Y<sub>2</sub>O<sub>3</sub> film. The ZnO film shows compact grains with average grain size of ~30nm, which are beneficial to the transportation of electrons. The Y<sub>2</sub>O<sub>3</sub> film shows no significant grains.

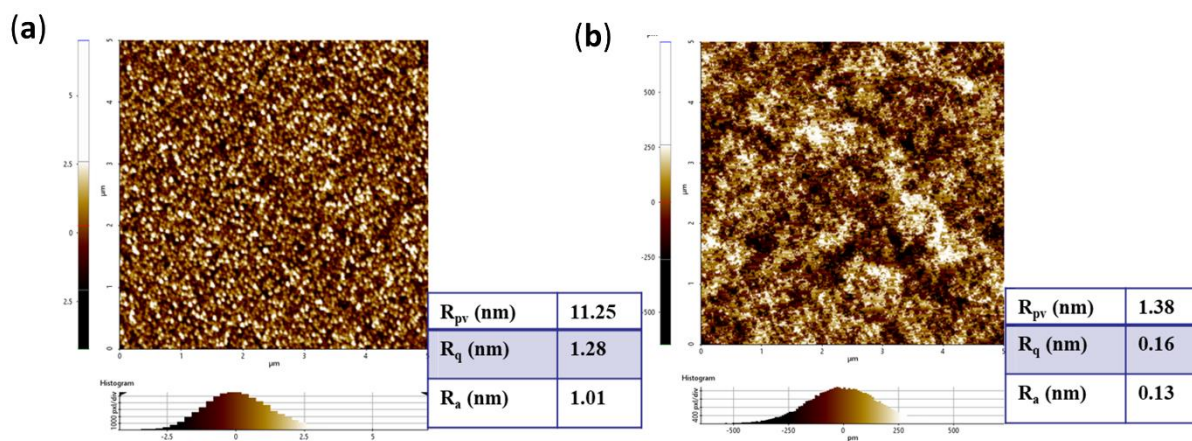

**Figure S3.** AFM image for surface roughness of spray coated (a) nano-crystalline ZnO film, and (b) amorphous  $Al_2O_3$  film. Due to crystallinity, the root mean square roughness ( $R_{rms}$ ) value of the ZnO film is 1.28 nm, whereas  $Al_2O_3$  film with amorphous structure showing  $R_{rms}$  value of 0.16 nm.

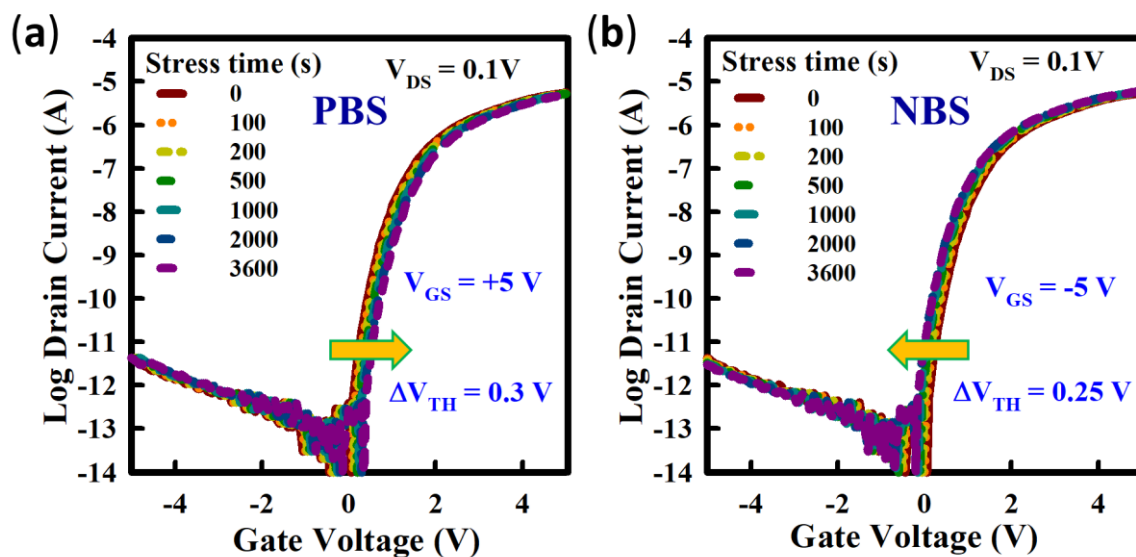

**Figure S4:** The evolution of transfer curve under bias stress for ZnO TFT without  $Y_2O_3$  passivation. Transfer curves of ZnO TFTs under (a) PBS, and (b) NBS, measured by sweeping  $V_{GS}$  from -5 to +5 V at the drain voltage,  $V_{DS} = 0.1$  V from 0 to 1 h.

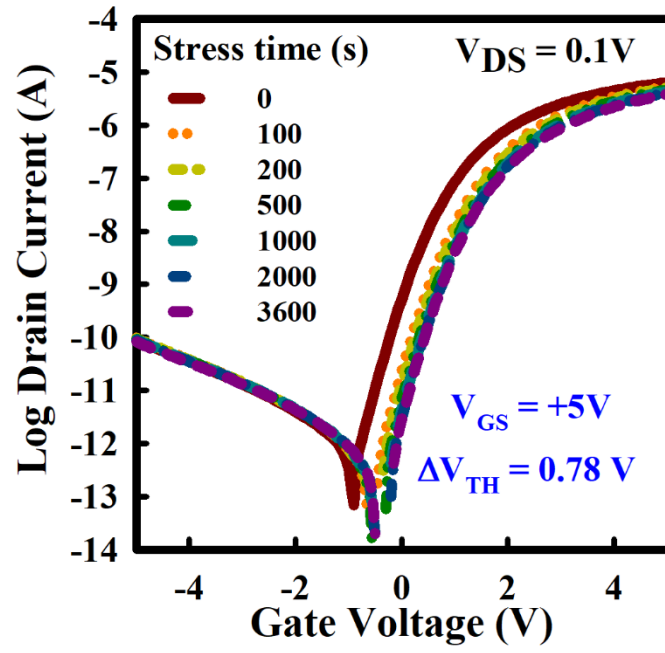

**Figure S5.** The evolution of transfer curve under positive bias temperature stress for ZnO TFT without  $\text{Y}_2\text{O}_3$  passivation. The transfer curve of the TFT measured by sweeping  $V_{GS}$  from -5 to +5 V at the drain voltage,  $V_{DS} = 0.1 \text{ V}$  for 1 h. The temperature stress was applied at  $T = 60^\circ\text{C}$ .

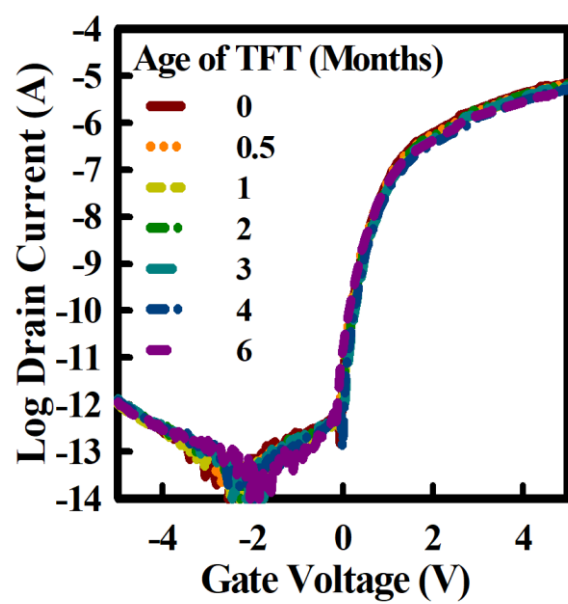

**Figure S6:** The evolution of transfer curve of  $\text{Y}_2\text{O}_3$  passivated ZnO TFT in ambient air for long term stability. The transfer curve of the TFT measured by sweeping  $V_{GS}$  from -5 to +5 V at the drain voltage,  $V_{DS} = 0.1\text{V}$ .
